# Supplementary material for: Predictive value of plasma proenkephalin and neutrophil gelatinase-associated lipocalin in acute kidney injury and mortality in cardiogenic shock
Source: Ann Intensive Care. 2021 Feb 5;11:25. doi: 10.1186/s13613-021-00814-8 (PMC7865050; doi:10.1186/s13613-021-00814-8)

**Supplementary Table 1. Areas under the receiver-operating characteristic curve for acute kidney injury occurring within 48 hours and 90-day all-cause mortality for P-PENK and P-NGAL at different time points.**

|  | AKI |  |  |  |
| --- | --- | --- | --- | --- |
|  | 0h | 12h | 24h | 48h |
|  | N=152 | N=148 | N=138 | N=122 |
| P-PENK | 0.621 | 0.743 | 0.803 | 0.779 |
|  | N=146 | N=102 | N=133 | N=116 |
| P-NGAL | 0.664 | 0.822 | 0.810 | 0.804 |
|  |  |  |  |  |
|  | 90-day mortality | |  |  |
|  | 0h | 12h | 24h | 48h |
|  | N=152 | N=148 | N=138 | N=122 |
| P-PENK | 0.684 | 0.736 | 0.756 | 0.687 |
|  | N=146 | N=102 | N=133 | N=116 |
| P-NGAL | 0.701 | 0.776 | 0.783 | 0.711 |

N=number of patients with samples available

**Supplementary Table 2. Spearman correlations between P-PENK and P-NGAL and other variables at baseline.**

| | P-PENK |  |  | P-NGAL |  |  | | --- | --- | --- | --- | --- | --- | |  | r(s) | p |  | r(s) | p | | eGFR | -0.657 | <0.001 | eGFR | -0.706 | <0.001 | | CysC | 0.650 | <0.001 | Crea | 0.692 | <0.001 | | P-NGAL | 0.629 | <0.001 | CysC | 0.683 | <0.001 | | Crea | 0.619 | <0.001 | P-PENK | 0.629 | <0.001 | | Lactate | 0.421 | <0.001 | Lactate | 0.513 | <0.001 | | Age | 0.365 | <0.001 | NT-proBNP | 0.332 | <0.001 | | NT-proBNP | 0.296 | <0.001 | Age | 0.261 | 0.001 | | AP | 0.173 | 0.03 | CRP | 0.238 | 0.004 | |  |  |  | AP | 0.229 | 0.006 | |  |  |  | ALT | 0.222 | 0.007 | |  |  |  |  |  |
| --- | --- | --- | --- | --- | --- | --- | --- | --- | --- | --- | --- | --- | --- | --- | --- | --- | --- | --- | --- | --- | --- | --- | --- | --- | --- | --- | --- | --- | --- | --- | --- | --- | --- | --- | --- | --- | --- | --- | --- | --- | --- | --- | --- | --- | --- | --- | --- | --- | --- | --- | --- | --- | --- | --- | --- | --- | --- | --- | --- | --- | --- | --- | --- | --- | --- | --- | --- | --- | --- | --- | --- | --- | --- | --- | --- | --- | --- |

**Supplementary Table 3. Cross tabulation of index test results**

| |  | no AKIcrea in 48hrs | AKIcrea in 48 hrs | |  |  | no AKIcrea in 48hrs | AKIcrea in 48 hrs | | | --- | --- | --- | --- | --- | --- | --- | --- | --- | | PENK0h <84.8 | 50 | 11 | 61 |  | NGAL0h <104 | 42 | 7 | 49 | | PENK0h >84.8 | 56 | 35 | 91 |  | NGAL0h >104 | 58 | 39 | 97 | |  | 106 | 46 |  |  |  | 100 | 46 |  | |  |  |  |  |  |  |  |  |  | |  | 90-day survivors | 90-day nonsurvivors | |  |  | 90-day survivors | 90-day nonsurvivors | | | PENK24h <105.7 | 76 | 16 | 92 |  | NGAL24h <151 | 65 | 14 | 79 | | PENK24h >105.7 | 14 | 30 | 44 |  | NGAL24h >151 | 19 | 33 | 52 | |  | 90 | 46 |  |  |  | 84 | 47 |  | |  |  |  |  |  |  |  |
| --- | --- | --- | --- | --- | --- | --- | --- | --- | --- | --- | --- | --- | --- | --- | --- | --- | --- | --- | --- | --- | --- | --- | --- | --- | --- | --- | --- | --- | --- | --- | --- | --- | --- | --- | --- | --- | --- | --- | --- | --- | --- | --- | --- | --- | --- | --- | --- | --- | --- | --- | --- | --- | --- | --- | --- | --- | --- | --- | --- | --- | --- | --- | --- | --- | --- | --- | --- | --- | --- | --- | --- | --- | --- | --- | --- | --- | --- | --- | --- | --- | --- | --- | --- | --- | --- | --- | --- | --- |

**Supplementary Figure 1. Diagram of study sampling times (arrows)**

**Supplementary Figure 2. STARD flow diagram of study participants. A: AKI B: 90-day mortality**

**A B**

**Supplementary Figure 2. Kaplan-Meier survival curves stratified by a) P-PENK >105.7 pmol/mL at 24 hours and b) P-NGAL >151ng/mL at 24 hours.**


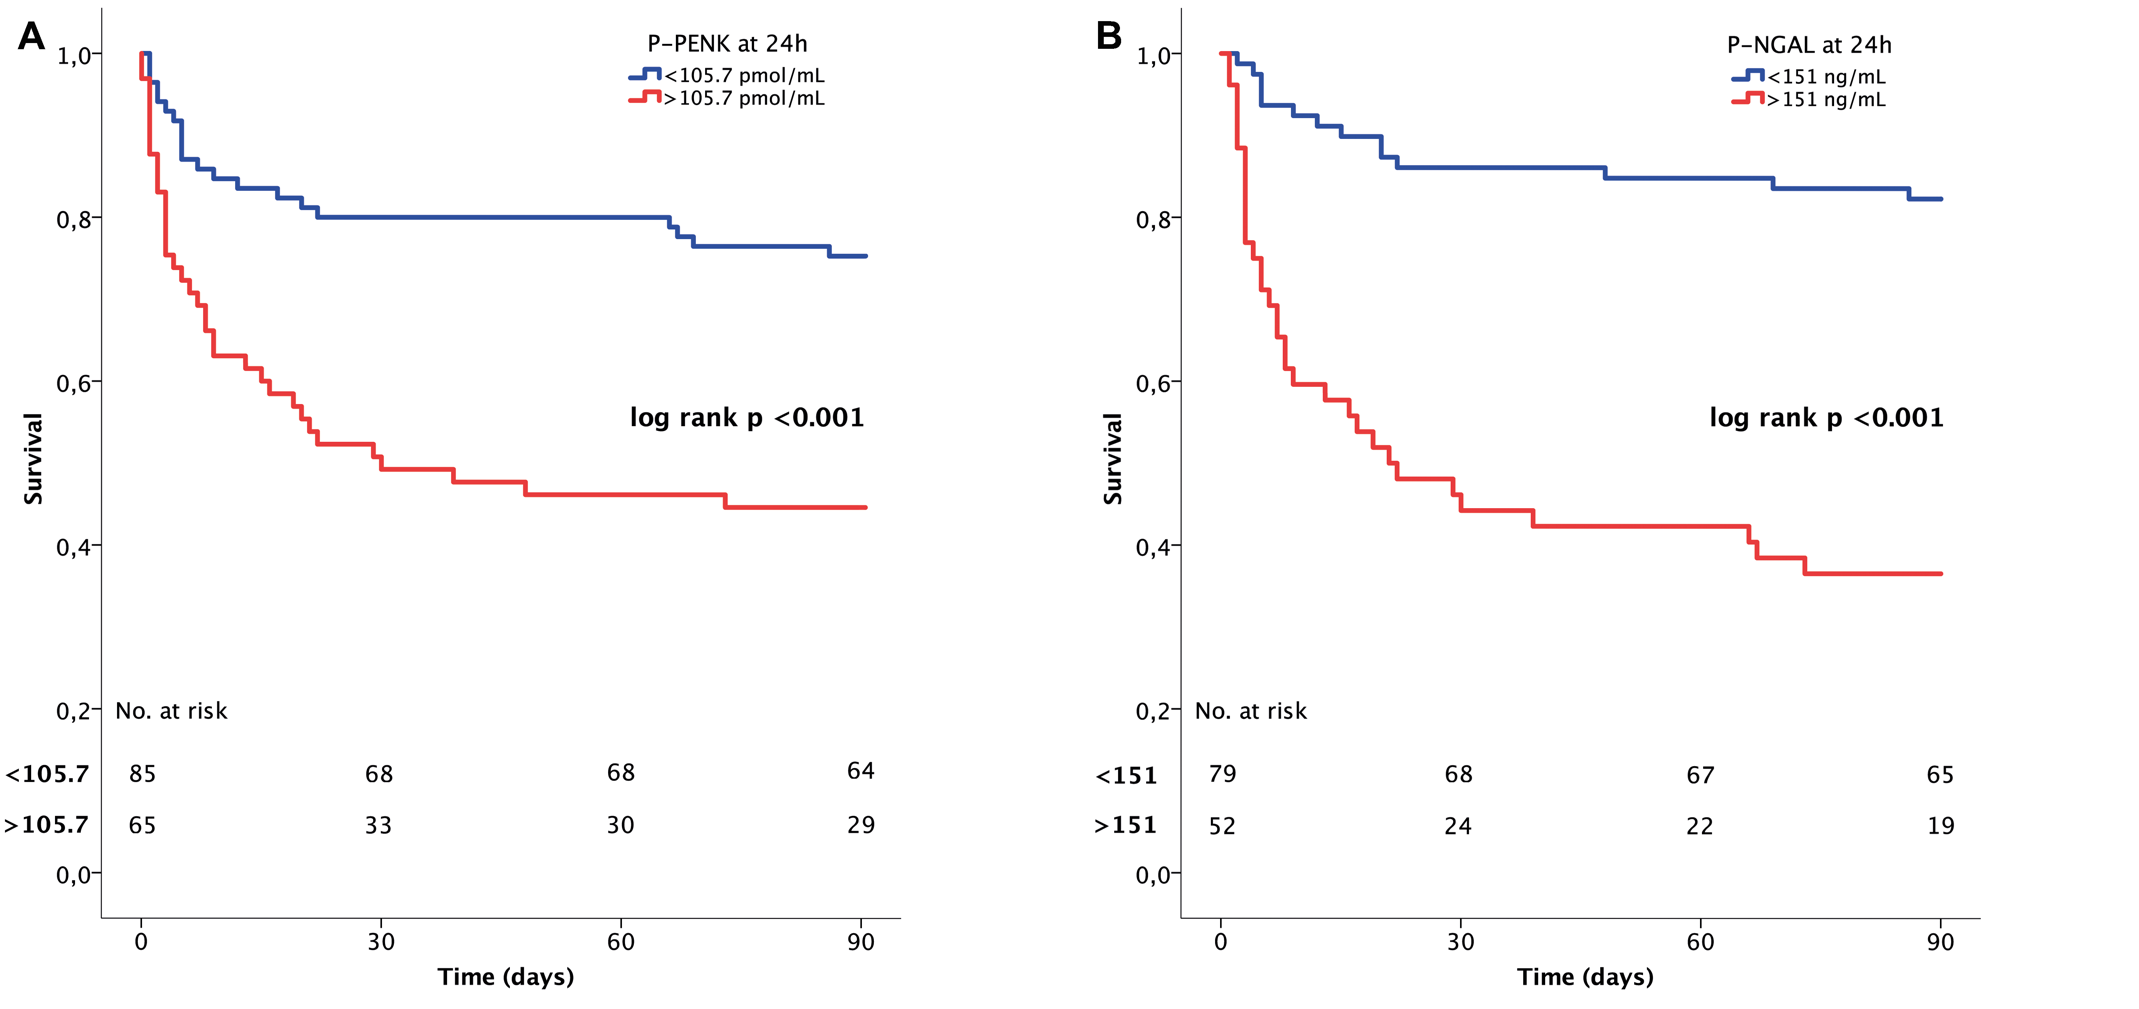

Supplement: Supplementary file 1 — Additional file 1 : Table S1. Areas under the receiver-operating characteristic curve for acute kidney injury occurring within 48 hours and 90-day all-cause mortality for P-PENK and P-NGAL at different time points. Table S2. Spearman correlations between P-PENK and P-NGAL and other variables at baseline. Table S3. Cross tabulation of index test results. Figure S1. Diagram of study sampling times. Figure S2. STARD flow diagram of study participants. A: AKI B: 90-day mortality. Figure S3. Kaplan–Meier survival curves stratified by a) P-PENK >105.7 pmol/mL at 24 hours and b) P-NGAL >151 ng/mL at 24 hours. [file 13613_2021_814_MOESM1_ESM.docx]
